1 **Cycloserine for Treatment of Multidrug-Resistant Tuberculosis in China: A**  
2 **Retrospective Observational Study**

3

4 Yang Li<sup>1,\*</sup>, Fei Wang<sup>2,\*</sup>, Limin Wu<sup>3</sup>, Min Zhu<sup>4</sup>, Guiqing He<sup>5</sup>, Feng Sun<sup>1</sup>, Qihui Liu<sup>1</sup>, Xiaomeng  
5 Wang<sup>2</sup>, Wenhong Zhang<sup>1</sup>

6

7

8 <sup>1</sup> Department of Infectious Diseases, Huashan Hospital, Fudan University, Shanghai 200032,  
9 China

10 <sup>2</sup> Zhejiang Provincial Center for Disease Control and Prevention, Hangzhou, Zhejiang 310006,  
11 China

12 <sup>3</sup> Hangzhou Center for Disease Control and Prevention, Hangzhou, Zhejiang 310021, China

13 <sup>4</sup> Tuberculosis Treatment Center, Hangzhou Red Cross Hospital, Hangzhou 310003, China

14 <sup>5</sup> Department of Infectious Diseases, Wenzhou Center Hospital, Wenzhou 325000, China

15

16 \* These authors contributed equally to this work.

17

18 **Emails:**

19 Yang Li: [y\\_li11@fudan.edu.cn](mailto:y_li11@fudan.edu.cn);

20 Fei Wang: [feiwang@cdc.zj.cn](mailto:feiwang@cdc.zj.cn);

21 Limin Wu: [2323533220@qq.com](mailto:2323533220@qq.com)

22 Min Zhu: [zhumindocto@163.com](mailto:zhumindocto@163.com)

23 Guiqing He: [lalaliy@sina.com](mailto:lalaliy@sina.com)

24 Feng Sun: [aaronsf1125@126.com](mailto:aaronsf1125@126.com)

25 Qihui Liu: [08301010265@fudan.edu.cn](mailto:08301010265@fudan.edu.cn)

26 Xiaomeng Wang: [xmwang@cdc.zj.cn](mailto:xmwang@cdc.zj.cn)

27 Wenhong Zhang: [zhangwenhong@fudan.edu.cn](mailto:zhangwenhong@fudan.edu.cn)

28

29

30 **Correspondence:** Xiaomeng Wang

31 E-mail: [xmwang@cdc.zj.cn](mailto:xmwang@cdc.zj.cn)

32 Address: No.630 Xincheng Road, Binjiang District, Hangzhou, Zhejiang 310051, China

33 Fax: 057187115183

34 Tel: 86-13906525336

35

36

## 37 **Abstract**

### 38 **Objectives**

39 Cycloserine is crucial in multidrug-resistant tuberculosis (MDR-TB) treatment. Although  
40 extensive research has been carried out on MDR-TB, most researchers have not treated  
41 cycloserine in much detail. Therefore, we evaluate the efficacy and safety of cycloserine and seek  
42 to clarify the role of cycloserine for treatment of simple MDR-TB, pre-extensively drug-resistant  
43 tuberculosis (pre-XDR-TB), and extensively drug-resistant tuberculosis (XDR-TB).

### 44 **Patients and methods**

45 A retrospective observational study was performed in China. We determined the treatment  
46 outcome as the primary outcome for 144 cycloserine-treated and 181 cycloserine-nontreated  
47 patients according to the definitions of WHO. The proportion of patients with sputum-culture  
48 conversion and the frequency of adverse drug reactions related to cycloserine were assessed as  
49 well.

### 50 **Results**

51 Among 325 MDR-TB patients, 144 were treated with cycloserine and 100 (69.4%) out of 144  
52 successfully completed treatment. Compared with patients in non-cycloserine group, the hazard  
53 ratio of any unfavorable treatment outcome was 0.53 (95%CI: 0.35–0.81,  $P=0.003$ ). Culture  
54 conversion rate at the intensive phase was similar whether cycloserine was administered or not  
55 ( $P=0.703$ ). Of the 144 patients treated with cycloserine, a total of 16 (11.1%) patients experienced  
56 side-effects related to cycloserine, including 7 patients who discontinued cycloserine permanently.

### 57 **Conclusions**

58 Cycloserine could be an attractive agent to treat MDR-TB. Its safety profile warrants use in the

59 most of MDR-TB cases. Cycloserine significantly improved the chance of favorable outcome for  
60 patients with simple MDR-TB but not pre-XDR-TB and XDR-TB. More aggressive regimens  
61 might be required for pre-XDR-TB or XDR-TB patients.

62

63 **KEYWORDS:** Cycloserine, multidrug-resistant tuberculosis, efficacy, safety, extensively

64 drug-resistant tuberculosis, simple MDR-TB

65

## 66 **Introduction**

67 Tuberculosis (TB) has been a continuing threat throughout the ages. Since the early 1990s, the  
68 global outbreaks of multidrug-resistant tuberculosis (MDR-TB), defined as tuberculosis (TB)  
69 caused by organisms that are resistant to rifampicin and isoniazid, have been reported and it is  
70 generally accepted that resistance to these two potent anti-TB agents is associated with an  
71 increased probability of catastrophic treatment costs and poorer treatment outcomes. Furthermore,  
72 extensively drug-resistant tuberculosis (XDR-TB), defined as MDR-TB plus resistance to a  
73 fluoroquinolone and an injectable second-line drug, has recently emerged and threaten the public  
74 health on a worldwide scale(1). In 2016, there were an estimated 490000 new cases of MDR-TB  
75 and globally the second highest number of drug-resistant TB (DR-TB) cases came from China.  
76 The latest data from the World Health Organization (WHO) reported a treatment success rates of  
77 54% for MDR-TB and only 30% for XDR-TB(2).

78 Cycloserine, a cyclic analogue to D-analogue, could target alanine racemase and D-alanine ligase,  
79 thus blocking the formation of bacterial cell wall(3). Cycloserine has been introduced in  
80 tuberculosis therapy since the late 1950s(4). Years later, Sommer *et al* found its potential for  
81 therapeutic intervention for chronic pulmonary tuberculosis(5). However, the neurological toxicity  
82 of cycloserine has been concerning clinicians and limiting its use widely. An earlier report  
83 described the neurological adverse effects of cycloserine that it would induce symptomatic  
84 seizures in approximately 10% patients(6). With more effective drugs like rifampicin discovered,  
85 cycloserine has been applicable only in the treatment of apparent or proved drug-resistant  
86 tuberculosis.

87 To implement tuberculosis control, WHO has published treatment guidelines for drug-resistant TB

88 in 1997 for the first time and cycloserine has been suggested since then as it shares no  
89 cross-resistance with other agents and might be valuable to prevent resistance to other active  
90 drugs(7). Cycloserine was classified as a Group 4 oral bacteriostatic second-line medication in the  
91 2008 recommendations(8). A study from Turkey in 2011 reported their experience in treating  
92 MDR-TB that the overall success rate of treatment achieved to 77% with the use of intensive  
93 regimens which included cycloserine(9). Meanwhile, WHO guidelines for the treatment of  
94 drug-resistant TB was updated and suggested a stronger association with cure of cycloserine than  
95 para-aminosalicylic acid (PAS)(10). In 2016, WHO regrouped the anti-TB agents and cycloserine  
96 was included in Group C (other core second-line agents) together with ethionamide (or  
97 prothionamide), linezolid and clofazimine. Generally, two or more of Group C agents are to be  
98 included when designing the core MDR-TB treatment regimen and ethionamide (or prothionamide)  
99 and cycloserine are supposed to be selected in preference to linezolid and clofazimine(2), which  
100 means that cycloserine would be in MDR-TB treatment's starting line-up. However, the clinical  
101 studies which mainly focused on cycloserine, particular in East Asia patients, are scarce, as the use  
102 of cycloserine was not approved in China until recently. In addition, the role of cycloserine in the  
103 treatment of XDR-TB or pre-XDR-TB (defined as resistance to isoniazid and rifampicin plus any  
104 fluoroquinolone or one of the injectable drugs) is not clear-out. To light of the uncertainties, we  
105 aimed to provide sufficient details to evaluate the efficacy, tolerability and safety of cycloserine in  
106 MDR/pre-XDR/XDR-TB treatment using a sizable cohort of patients with MDR-TB from China.

107

## 108 **Patients and methods**

### 109 **Study design and procedures**

110 This retrospectively cohort study was performed at two hospitals located in Zhejiang Province,  
111 China initiated by the Zhejiang Disease Control and Prevention Center (CDC) who has set up  
112 routine drug resistance monitoring for TB since 1999(11). Patients aged above 18 who were  
113 diagnosed with active MDR-TB were recruited consecutively during March 2012 through  
114 December 2015 to obtain full follow-up information. Positive culture for *Mycobacterial*  
115 *tuberculosis* and resistance to isoniazid and rifampicin proven by drug-susceptibility testing were  
116 required at enrolment. Furthermore, the participants were included when their treatment therapies  
117 were adapted to WHO recommendations (2016 version). Patients were excluded when met any of  
118 the following criteria: (1) positive for HIV test; (2) history of seizure disorder, mental depression,  
119 or severe anxiety; (3) decline to participate in this study.

120 The following information were collected: sociodemographic characteristics, indicators of severity  
121 (symptoms and radiologic findings), previous treatment, drug-resistant profiles, and background  
122 treatment regimen. Culture and sputum conversion and chest X-rays were performed periodically  
123 for treatment outcomes evaluation. Moreover, adverse drug reactions were monitored and  
124 promptly managed during the entire treatment course.

125 Approval for collection of data was provided by the ethics committees of Zhejiang CDC. All  
126 patients provided written informed consent.

127

## 128 **Definitions**

129 MDR-TB was defined as tuberculosis caused by a strain as *M. tuberculosis* that was resistant to at  
130 least isoniazid and rifampicin. XDR-TB was MDR-TB that was also resistant to the  
131 fluoroquinolones and any of second-line injectable drugs (capreomycin, kanamycin and amikacin).

132 Pre-XDR-TB was MDR-TB that was resistant to either a fluoroquinolone or a second-line  
133 injectable drug, but not both. In the present study, we use the term simple MDR-TB to refer to  
134 those with resistance to just isoniazid and rifampicin and complicated MDR-TB to refer to those  
135 with additional resistance beyond isoniazid and rifampicin including pre-XDR-TB and XDR-TB.  
136 Standard treatment outcome definitions were applied according to the definitions and reporting  
137 framework for TB from WHO in 2013(12). Cured was defined as treatment completed without  
138 evidence of failure and three or more consecutive cultures were negative after the intensive phase.  
139 If bacteriological results were lacking (*i.e.* fewer than three cultures performed), the case was  
140 defined as treatment completed. Treatment failure was defined as treatment terminated or need for  
141 permanent regimen change of at least two anti-TB drugs because of lack of conversion by the end  
142 of the intensive phase, or bacteriological reversion in the continuation phase after conversion to  
143 negative, or adverse drug reaction. Default was defined as interruption of treatment for at least 2  
144 months not meeting the criteria for failure. This study used the following brief outcomes:  
145 favorable outcome was defined as cured and treatment completion; unfavorable outcome was  
146 defined as any failure, default or death while on treatment.  
147 When assessing the adverse drug reaction, we distinguished two types of side-effects: major  
148 side-effects and minor side-effects(13). The former referred to any adverse reactions that resulted  
149 in temporary or permanent discontinuation of anti-TB drugs, while the latter referred to those that  
150 only required dose adjustment and/or addition of concomitant treatment.

151

## 152 **Drug susceptibility testing**

153 Sputum culture on Löwenstein–Jensen medium or MGIT 960 were applied routinely. Phenotypic



154 drug susceptibility testing to two first-line drugs (rifampicin, isoniazid) and two second-line drugs  
155 (ofloxacin and kanamycin) was performed from the first positive *Mycobacterial tuberculosis*  
156 culture with the use of the proportion method and the result was compared with the standardised  
157 strains. The critical drug concentrations of rifampicin, isoniazid, ofloxacin, and kanamycin were  
158 40, 0.2, 2, and 30 µg/ml respectively(14).

159

#### 160 **Data management and statistical analysis**

161 The clinical data were collected through questionnaires and medical records by trained health  
162 workers. For the analysis, patients were divided into two cohorts according to the presence or  
163 absence of cycloserine in the background regimen (Cycloserine cohort *versus* Non-cycloserine  
164 cohort). Continuous variables were calculated as mean with standard deviation (SD) and median  
165 with interquartile range and were further compared by Mann-Whitney *U* test. Categorical data  
166 were presented as numbers (percentage) and were compared with the use of  $\chi^2$  test.

167 The primary outcome was the proportion of favorable treatment in each treatment cohort.  
168 Secondary outcome included the efficacy of cycloserine measured by the proportion of conversion  
169 within the intensive phase and safety and tolerability of cycloserine measured by the frequency of  
170 major and minor reactions.

171 For the primary outcome, all patients' treatment outcomes were identified according to the  
172 definitions described above by two clinicians blinded for the background regimen. And the  
173 proportion of each treatment outcome for two cohort were calculated. Considering the potential  
174 confounders, we further investigated the effect of cycloserine upon the treatment outcome by  
175 using a Cox proportional-hazards model. Furthermore, we did the specific subgroup analyses of

176 patients with different drug resistance patterns.

177 Two-tailed *P* value of less than 0.05 was considered statistically significant. All statistical  
178 calculations and analyses in this study were performed with the use of SPSS Statistics, version  
179 22.0 (IBM).

180

## 181 **Results**

### 182 **Study population**

183 Enrolment of patients began in March 2012 and the follow-up for the last patient was performed  
184 by December 2017. A total of 582 patients were assessed for eligibility. 241 patients were  
185 excluded because their background regimens were not adapted to WHO recommendations (2016  
186 versions) and 11 patients were excluded because the strains from their isolates were identified as  
187 nontuberculous mycobacteria. Moreover, three patients with HIV positive and two patients with  
188 mental illness in the control group were excluded as well. Consequently, 325 patients confirmed to  
189 have an organism resistant to both rifampicin and isoniazid were enrolled, 144 of whom were  
190 treated with cycloserine in their background regimen according to WHO guidelines for designated  
191 dosages of 500mg or 750mg per day (500mg for 38 patients weight less than 50kg; 750mg for 96  
192 patients more than 50kg). All patients' background regimen included one of fluoroquinolones and  
193 only two patients in cycloserine group had not been treated with aminoglycosides as the initial  
194 treatment. Most of demographic and baseline clinical characteristics were comparable among two  
195 treatment cohorts except tuberculosis cavity being more frequent in the cycloserine group. The  
196 mean age was 42.9 years and approximately 70% of patients were male. 27.4% (89/325) patients  
197 were treated with at least one of fluoroquinolones or aminoglycosides more than 30 days before.

198 More details could be found in Table 1.

199

### 200 **Treatment outcome**

201 There was a trend approaching a level of significance in treatment outcome: 100 out of 144  
202 (69.4%) cycloserine-treated patients achieved treatment success *versus* 108 out of 181 (59.7%)  
203 non-cycloserine-treated patients ( $\chi^2$  test,  $P=0.089$ , Table 2). The absence to sputum conversion at  
204 6 months and severe adverse drug effects resulting in two or more drugs stoppage were the main  
205 reason for treatment failure; the relative responsibilities were 35.1% and 43.3% in the cycloserine  
206 group and 41.7% and 43.3% in the non-cycloserine group respectively. One patient was  
207 complicated by pulmonary infection and died on the eighteenth months of treatment. To reduce  
208 confounding bias, a Cox regression analysis was used and suggested that introduction of  
209 cycloserine to the standard drug regimen resulted in significantly less risk of unfavorable  
210 treatment outcomes (Hazard Ratio, [HR]: 0.58, 95% confidence interval [CI]: 0.35–0.81,  $P=0.003$ ,  
211 Table 3).

212

### 213 **Efficacy end-points assessment**

214 Efficacy was mainly measured by sputum culture conversion and proved to be roughly similar  
215 between two groups. There was no difference in the proportion achieving sputum culture  
216 conversion at the end of intensive phase (117/144,81.3% *versus* 144/181,79.6%,  $P=0.703$ ) or at  
217 the end of treatment (127/144,88.2% *versus* 149/181,82.3%,  $P=0.142$ ) between the cycloserine  
218 group and non-cycloserine group. For those who had sputum culture conversion, the mean $\pm$ SD  
219 time to culture conversion in patients treated with cycloserine were longer than those without (90 $\pm$

220 121 days *versus* 59±61 days,  $P=0.003$ ). With the use of Cox regression analysis, cycloserine also  
221 did not accelerate sputum culture conversion (HR: 1.057, 95%CI: 0.814–1.372,  $P=0.679$ ).

222

### 223 **Safety assessment**

224 Overall, 132 of 144 patients (91%) in the cycloserine group and 161 of 181 patients (89%) in the  
225 non-cycloserine group had clinically significant adverse drug reactions. The most frequent adverse  
226 events were gastrointestinal effects (nausea and vomiting), arthralgia, liver injury and  
227 hypokalaemia in both two treatment groups (Figure 1). Among these 132 patients reporting  
228 adverse events in the cycloserine group, 37 (28%) experienced major adverse-effects, whereas 95  
229 (72%) patients experienced minor side-effects. Adverse events attributed to cycloserine are shown  
230 in Table 4. Side-effects that were possibly or probably related to cycloserine appeared after a  
231 median of 71 days (range 10–331 days) of cycloserine treatment. A total of sixteen patients  
232 reported seventeen episodes related to cycloserine, including nine patients discontinued  
233 cycloserine temporarily or permanently. We observed eight episodes of headache and cycloserine  
234 was permanently withdrawn from the treatment regimen in two patients. Moreover, two cases of  
235 seizure, one case of depression, and two cases of anxiety were observed, with these events  
236 resulting in cycloserine discontinuation within the first six months of treatment. No suicidal  
237 ideation was observed.

238

### 239 **Treatment outcomes stratified by resistance patterns**

240 The treatment outcomes were further compared between two groups stratified by resistance  
241 patterns (Figure 2). Among simple MDR-TB patients, the proportion of treatment success in the

242 cycloserine group was higher than the non-cycloserine group, reaching statistical significance  
243 (68/85, 80.0% *versus* 73/117, 62.4%,  $P=0.007$ ). For other strata, the treatment success rate in the  
244 cycloserine group was almost similar to patients who were not treated with cycloserine. Or rather,  
245 among pre-XDR-TB patients, the proportion achieving favorable outcome was 56.3% (27/48) in  
246 those receiving cycloserine *versus* 56.9% (29/51) in those treated without cycloserine ( $P=0.951$ );  
247 and among XDR-TB patients, the proportion of favorable outcome was 45.5% (5/11) and 46.2%  
248 (6/13), respectively ( $P=0.973$ ). We also calculated the sputum conversion rate at six months and  
249 observed no significant difference between two groups regardless of the resistance patterns (data  
250 not shown). Moreover, a downward trend in favorable treatment outcome rate was observed with  
251 the increase in the extent of drug resistance in both groups.

252

### 253 **Risk factors to unfavorable treatment outcomes**

254 The associations between unfavorable treatment outcomes and each baseline variables were firstly  
255 assessed with univariate Cox regression model. Those variables with  $P$  value  $< 0.1$  would be  
256 included into multivariate Cox regression model (Table 3). Using a Cox regression analysis, we  
257 found that a significant risk of unfavorable treatment outcomes related to age older than 60 years  
258 (HR: 2.61, 95%CI: 1.46–4.65;  $P=0.001$ ), presence of cough before starting treatment (HR: 2.34,  
259 95%CI: 1.07–5.11;  $P=0.033$ ), and previous exposure to fluoroquinolones more than 30 days (HR:  
260 1.71, 95%CI: 1.08–2.83;  $P=0.024$ ) or resistance to fluoroquinolones proven by drug-susceptibility  
261 testing (HR: 1.92, 95%CI: 1.16–3.16;  $P=0.011$ ).

262

### 263 **Discussion**

264 The research on tuberculosis treatment has witnessed a clear shift from drug-sensitive tuberculosis  
265 to drug-resistant tuberculosis, as more than half of patients with drug-resistant tuberculosis  
266 experience treatment failure owing to the weaknesses and intolerability of current treatment  
267 regimen for drug-resistant tuberculosis. To improve the treatment outcome, intensified research  
268 and innovation, the third pillar of WHO's Post-2015 Global Tuberculosis Strategy, has been  
269 emphasized(15). Safer, easier and shorter treatment regimens is a critical target that clinicians are  
270 moving forward to. The arrival of novel drugs like delamanid and bedaquiline has offered fresh  
271 opportunities(16)(17) but up to now, there are not enough new drugs to establish an entirely new  
272 regimen, so that the effective use of existing tools is urgently needed to combat tuberculosis.

273 In this study, we focus on cycloserine, an agent that would be added into the initial treatment  
274 regimen in priority for MDR-TB according to WHO recommendation, because the evaluation of  
275 this drug is greatly hampered by the lack of randomized controlled trials or cohort studies with a  
276 reliable outcome measure. To our knowledge, this is the first controlled study to seek to define or  
277 optimise the role of cycloserine in drug-resistant tuberculosis treatment. Our data reported an  
278 overall treatment success rate of 69.4% within 24 months in the patients treated with cycloserine.

279 Previous studies suggested that the successful outcome rate ranged from 67.5% to  
280 77.0%(18)(9)(19), almost in accordance with our results. There are several possible reasons to  
281 explain the slight differences. Firstly, the definition of treatment outcome has been updated and  
282 further emphasized the tolerability of the regimens which was likely to be underappreciated before.

283 Secondly, some studies combined adjustive therapy like surgical resection that resulted in  
284 improved treatment outcomes(9)(20). Moreover, the accelerated development of pre-XDR-TB and  
285 XDR-TB probably reduces the treatment success rate.

286 Furthermore, compared with the patients in the non-cycloserine group whose regimens mainly  
287 included PAS instead of cycloserine, it is suggesting a significant trending towards improved  
288 proportion of favorable treatment outcome after the introduction of cycloserine. Based on the  
289 current definition we applied, favorable treatment outcome should meet at least three requirements  
290 including sputum culture conversion within six months, no sputum reversion, and no severe  
291 adverse drug reactions requiring two or more drugs to be discontinued, which indicates that  
292 treatment outcome assessments need to integrate efficacy end-points and safety end-points.

293 Efficacy end-points in this study were mainly measured by time to and proportion of sputum  
294 culture conversion. Unlikely drug-susceptible tuberculosis, failure to sputum conversion rather  
295 than relapse or sputum reversion accounted for a great proportion of treatment failure(21),  
296 suggesting that the current regimens for MDR-TB might not show the strong sterilizing activity.

297 As for cycloserine, our study did not provide sufficient evidence that cycloserine could confer a  
298 benefit to culture conversion compared with other standardised treatment regimens. A possible  
299 explanation for these results may be that treatment of MDR-TB includes multiple drugs and an  
300 observational study without strict placebo controls hardly assesses the efficacy of a single agent.

301 Furthermore, a recent study (22) has showed that more than half of patients with the recommended  
302 dosage of 10mg/kg of cycloserine prescription had peak serum concentrations lower than the  
303 minimum inhibitory concentrations of the strains isolated from the corresponding patients,  
304 suggesting the personal need for adjusting dosages depending on the clinical pharmacokinetic and  
305 pharmacodynamic assessments(23).

306 Adverse drug reaction remains problematic during the treatment course for MDR-TB patients. By  
307 contrast with other anti-TB agents, ADR attributed to cycloserine was relatively uncommon with a

308 frequency of 11.1%. Therefore, cycloserine might be regarded as a safer alternative agent to those  
309 with frequent severe side effects that tend to result in drug discontinuation and eventually  
310 unfavorable clinical outcomes. Similar results were found in a meta-analysis that estimated the  
311 frequencies of any ADR from cycloserine at 9.1% (95%CI: 6.4-11.7)(24). Neuropsychiatric  
312 reactions, as expect, were representative of adverse effects of cycloserine since its central active  
313 mechanism as a partial NMDA-agonist and high brain-blood-barrier permeability(25). In this  
314 study, headache was one of the most common side-effects of cycloserine reported by patients  
315 although almost headache resolved quickly with an adjustment in the dose or the temporary  
316 discontinuation of cycloserine. Seizure was rare, mainly associated with high dosages (especially  
317 with concentrations levels exceeding 40 µg/ml)(26), co-administration of fluoroquinolones, and  
318 alcoholism(25), but all led to the withdrawal of cycloserine in this study. Psychiatric disturbances  
319 were also described on rare occasions in our study but were more complicated to manage for  
320 clinicians. In detail, depression or anxiety might be partly attributable to the inadequate social  
321 support and lacking of confidence owing to previous poor treatment outcomes, such as the patient  
322 (P89) of depression who had been infected with *Mycobacterium Tuberculosis* for more than eight  
323 years complicated with post-tuberculosis destroyed lung and complained of unbearable arthralgia  
324 during the treatment. The major challenge is the lack of reference standard against which to  
325 evaluate psychiatric events. However, the current psychiatric reactions to cycloserine is mainly  
326 based on case reports (27) and further controlled studies are needed to validate it scientifically.

327 To explore the role of cycloserine for patients with different resistance patterns, we did a subgroup  
328 analysis and observed the significant improvement in treatment outcomes related to cycloserine in  
329 simple MDR-TB patients, which was hindered greatly in complicated MDR-TB patients. The



330 findings from subgroup analyses suggested cycloserine alone are of less benefit without more  
331 effectiveness drugs as linezolid for complicated MDR-TB patients(13), indicating the requirement  
332 for reprioritization of cycloserine when managing highly resistant forms of tuberculosis. The  
333 treatment of complicated MDR-TB, especially XDR-TB, has been considered as a conundrum  
334 facing clinicians. In accordance, this study identified the limited beneficial impact of the  
335 standardised five-drug regimen in complicated MDR-TB, calling for new or repurposed agents to  
336 effectively eradicate extensive drug-resistant *Mycobacterium Tuberculosis*.

337 This retrospective study has several limitations. First, the major limitations derive from the  
338 observational study design which precluded us from controlling of confounding bias well and  
339 looking at some important topics, especially pharmacokinetic and pharmacodynamic assessments  
340 of cycloserine. Secondly, some strains isolated from patients were missing and thus we did not  
341 perform the drug susceptibility testing to cycloserine. Moreover, as cycloserine had not been  
342 approved in China until 2014, its availability and affordability require further evaluation.

343 To summarize, introduction of cycloserine improved the overall favorable outcome of MDR-TB  
344 patients. Cycloserine is considered a better-tolerated agent with infrequent adverse side-effects  
345 characterized with neuropsychiatric reactions. For simple MDR-TB patients, we believe our  
346 results support the use of cycloserine in the setting of correct patient assessment and monitoring.

347 And for complicated MDR-TB patients, more effective treatment options may be considered.

348

349

### 350 **Acknowledgements**

351 We thank all patients for affording their treatment profiles and all health care workers who

352 participated in this effort.

353

#### 354 **Financials**

355 This study is funded by Zhejiang-National Committee of Health and Family Planning

356 Co-Sponsored Project (WKJ-ZJ-07).

357

358

359

360

#### 361 **References:**

362 1. Shah NS, Wright A, Bai GH, Barrera L, Boulahbal F, Martín-Casabona N, Drobniewski F,

363 Gilpin C, Havelková M, Lepe R, Lumb R, Metchock B, Portaels F, Rodrigues MF,

364 Rüsich-Gerdes S, Van Deun A, Vincent V, Laserson K, Wells C, Cegielski JP. 2007.

365 Worldwide emergence of extensively drug-resistant tuberculosis. *Emerg Infect Dis* 13:380–

366 387.

367 2. World Health Organization WH, Global Tuberculosis Programme. 2016. WHO treatment

368 guidelines for drug-resistant tuberculosis : 2016 update. Who 56.

369 3. Bruning JB, Murillo AC, Chacon O, Barletta RG, Sacchetti JC. 2011. Structure of the

370 *Mycobacterium tuberculosis* D-alanine:D-alanine ligase, a target of the antituberculosis drug

371 D-cycloserine. *Antimicrob Agents Chemother* 55:291–301.

372 4. Epstein IG, Nair KGS, Boyd LJ. 1955. Cycloserine, a New Antibiotic, in the Treatment of

373 Human Pulmonary Tuberculosis: a Preliminary Report. *Antibiot Med* 1:80–93.

- 374 5. Somner AR, Brace AA. 1962. Ethionamide, pyrazinamide and cycloserine used successfully in  
375 the treatment of chronic pulmonary tuberculosis. *Tubercle* 43:345–360.
- 376 6. Cohen AC. 1969. Pyridoxine in the prevention and treatment of convulsions and neurotoxicity  
377 due to cycloserine. *Ann N Y Acad Sci* 166:346–349.
- 378 7. Crofton Sir, J, Chaulet P, Maher D. 1997. GUIDELINES FOR THE MANAGEMENT OF  
379 DRUG-RESISTANT TUBERCULOSIS. *Trans R Soc Trop Med Hyg* 92.
- 380 8. World Health Organization. 2008. Guidelines for the programmatic management of  
381 drug-resistant tuberculosis Guidelines for the programmatic management of drug-resistant  
382 tuberculosis. *World Heal Organ* 12–185.
- 383 9. Tahaoğlu K, Törün T, Sevim T, Ataç G, Kir A, Karasulu L, Ozmen I, Kapakli N. 2001. The  
384 treatment of multidrug-resistant tuberculosis in Turkey. *N Engl J Med* 345:170–4.
- 385 10. Falzon D, Jaramillo E, Schünemann HJ, Arentz M, Bauer M, Bayona J, Blanc L, Caminero JA,  
386 Daley CL, Duncombe C, Fitzpatrick C, Gebhard A, Getahun H, Henkens M, Holtz TH,  
387 Keravec J, Keshavjee S, Khan AJ, Kulier R, Leimane V, Lienhardt C, Lu C, Mariandyshev A,  
388 Migliori GB, Mirzayev F, Mitnick CD, Nunn P, Nwagboniwe G, Oxlade O, Palmero D,  
389 Pavlinac P, Quelapio MI, Raviglione MC, Rich ML, Royce S, Rüsç-Gerdes S, Salakaia A,  
390 Sarin R, Sculier D, Varaine F, Vitoria M, Walson JL, Wares F, Weyer K, White RA, Zignol M.  
391 2011. WHO guidelines for the programmatic management of drug-resistant tuberculosis: 2011  
392 update. *Eur Respir J* 38:516–528.
- 393 11. Wang X, Fu Q, Li Z, Chen S, Liu Z, Nelson H, Yang Q, Jia Z, Dye C. 2012. Drug-resistant  
394 tuberculosis in zhejiang province, China, 1999-2008. *Emerg Infect Dis* 18:496–498.
- 395 12. 2013. Who revised definitions and reporting framework for tuberculosis. *Eurosurveillance* 18.

- 396 13. Migliori GB, Eker B, Richardson MD, Sotgiu G, Zellweger JP, Skrahina A, Ortmann J, Girardi  
397 E, Hoffmann H, Besozzi G, Bevilacqua N, Kirsten D, Centis R, Lange C. 2008. A retrospective  
398 TBNET assessment of linezolid safety, tolerability and efficacy in multidrug-resistant  
399 tuberculosis. *Eur Respir J* 34:387–393.
- 400 14. Who. 2008. Policy guidance on drug-susceptibility testing ( DST ) of second-line  
401 antituberculosis drugs World Health Organization. *World Health* 1–20.
- 402 15. Lönnroth K, Raviglione M. 2015. The WHO’s new end tb strategy in the post-2015 era of the  
403 sustainable development goals. *Trans R Soc Trop Med Hyg.*
- 404 16. Ferlazzo G, Mohr E, Laxmeshwar C, Hewison C, Hughes J, Jonckheere S, Khachatryan N, De  
405 Avezedo V, Egazaryan L, Shroufi A, Kalon S, Cox H, Furin J, Isaakidis P. 2018. Early safety  
406 and efficacy of the combination of bedaquiline and delamanid for the treatment of patients with  
407 drug-resistant tuberculosis in Armenia, India, and South Africa: A retrospective cohort study.  
408 *Lancet Infect Dis.*
- 409 17. Diacon AH, Pym A, Grobusch MP, de los Rios JM, Gotuzzo E, Vasilyeva I, Leimane V,  
410 Andries K, Bakare N, De Marez T, Haxaire-Theeuwes M, Lounis N, Meyvisch P, De Paepe E,  
411 van Heeswijk RPG, Dannemann B. 2014. Multidrug-Resistant Tuberculosis and Culture  
412 Conversion with Bedaquiline. *N Engl J Med* 371:723–732.
- 413 18. Prasad R, Verma SK, Sahai S, Kumar S, Jain a. 2006. Efficacy and Safety of Kanamycin ,  
414 Ethionamide , PAS and Cycloserine in Multidrug-resistant Pulmonary Tuberculosis Patients.  
415 *Indian J Chest Dis Allied Sci* 48:183–186.
- 416 19. Masjedi MR, Tabarsi P, Chitsaz E, Baghaei P, Mirsaeidi M, Amiri M V., Farnia P, Javanmard  
417 P, Mansouri D, Velayati AA. 2008. Outcome of treatment of MDR-TB patients with

- 418 standardised regimens, Iran, 2002-2006. *Int J Tuberc Lung Dis* 12:750–755.
- 419 20. Mitnick CD, Shin SS, Seung KJ, Rich ML, Atwood SS, Furin JJ, Fitzmaurice GM, Alcantara  
420 Viru FA, Appleton SC, Bayona JN, Bonilla CA, Chalco K, Choi S, Franke MF, Fraser HSF,  
421 Guerra D, Hurtado RM, Jazayeri D, Joseph K, Llaro K, Mestanza L, Mukherjee JS, Muñoz M,  
422 Palacios E, Sanchez E, Sloutsky A, Becerra MC. 2008. Comprehensive treatment of  
423 extensively drug-resistant tuberculosis. *N Engl J Med* 359:563–574.
- 424 21. Cegielski JP, Dalton T, Yagui M, Wattanaamornkiet W, Volchenkov G V., Via LE, Van Der  
425 Walt M, Tupasi T, Smith SE, Odendaal R, Leimane V, Kvasnovsky C, Kuznetsova T,  
426 Kurbatova E, Kummik T, Kuksa L, Kliiman K, Kiryanova E V., Kim HJ, Kim CK, Kazenny  
427 BY, Jou R, Huang WL, Ershova J, Erokhin V V., Diem L, Contreras C, Cho SN, Chernousova  
428 LN, Chen MP, Caoili JC, Bayona J, Akksilp S. 2014. Extensive drug resistance acquired during  
429 treatment of multidrug-resistant tuberculosis. *Clin Infect Dis* 59:1049–1063.
- 430 22. Yu X, Zeng X, Shi W, Hu Y, Nie W, Chu N, Huang H. 2018. Validation of Cycloserine  
431 Efficacy in Treatment of Multidrug-Resistant and Extensively Drug-Resistant Tuberculosis in  
432 Beijing, China. *Antimicrob Agents Chemother* 2018/01/10. 62.
- 433 23. Hung WY, Yu MC, Chiang YC, Chang JH, Chiang CY, Chang CC, Chuang HC, Bai KJ. 2014.  
434 Serum concentrations of cycloserine and outcome of multidrug-resistant tuberculosis in  
435 Northern Taiwan. *Int J Tuberc Lung Dis* 2014/06/07. 18:601–606.
- 436 24. Hwang TJ, Wares DF, Jafarov A, Jakubowiak W, Nunn P, Keshavjee S. 2013. Safety of  
437 cycloserine and terizidone for the treatment of drug-resistant tuberculosis: A meta-analysis. *Int*  
438 *J Tuberc Lung Dis*.
- 439 25. Schade S, Paulus W. 2016. D-Cycloserine in Neuropsychiatric Diseases: A Systematic Review.

- 440 Int J Neuropsychopharmacol 2015/09/14. 19.
- 441 26. Holmes CX, Martin GE, Fetterhoff KI. 1959. The role of the cycloserine (seromycin) blood  
442 level in the treatment of pulmonary tuberculosis and the prevention and control of cycloserine  
443 (seromycin) toxicity. Dis Chest 1959/12/01. 36:591–593.
- 444 27. Sharma B, Handa R, Nagpal K, Prakash S, Gupta PK, Agrawal R. 2014. Cycloserine-induced  
445 psychosis in a young female with drug-resistant tuberculosis. Gen Hosp Psychiatry 36.
- 446

**Table 1 Characteristics of multidrug resistant tuberculosis cases treated with or without cycloserine.**

|                                                                     | <b>Cycloserine<br/>(N=144)</b> | <b>No Cycloserine<br/>(N=181)</b> | <b>P value</b> |
|---------------------------------------------------------------------|--------------------------------|-----------------------------------|----------------|
| <b>Age (years)</b>                                                  |                                |                                   |                |
| Mean ± SD                                                           | 44.0 ± 12.7                    | 41.7 ± 13.1                       | 0.067          |
| Median (IQR)                                                        | 45 (35–54)                     | 40 (31–53)                        |                |
| <b>Female sex</b>                                                   | 45 (31.3%)                     | 51 (28.2%)                        | 0.546          |
| <b>Bodyweight (kg)</b>                                              |                                |                                   |                |
| Mean ± SD                                                           | 54.2 ± 8.8                     | 53.8 ± 7.8                        | 0.541          |
| Median (IQR)                                                        | 54 (48–60)                     | 52.5 (49–60)                      |                |
| <b>Medical history of DM</b>                                        | 21 (14.6%)                     | 19 (10.5%)                        | 0.265          |
| <b>Tuberculosis symptoms</b>                                        |                                |                                   |                |
| Fever                                                               | 28 (19.4%)                     | 19 (10.5%)                        | 0.023          |
| Fatigue                                                             | 26 (18.1%)                     | 42 (23.2%)                        | 0.257          |
| Haemoptysis                                                         | 26 (18.1%)                     | 35 (19.3%)                        | 0.769          |
| Dyspnoea                                                            | 2 (1.4%)                       | 6 (3.3%)                          | 0.309          |
| Cough                                                               | 127 (88.2%)                    | 151 (83.4%)                       | 0.225          |
| <b>Chest radiograph</b>                                             |                                |                                   |                |
| Presence of cavity                                                  | 113 (78.5%)                    | 117 (64.6%)                       | 0.006          |
| Bilateral involvement                                               | 103 (71.5%)                    | 139 (76.8%)                       | 0.279          |
| <b>Previous TB medications</b>                                      |                                |                                   |                |
| Fluoroquinolones                                                    | 36 (25.0%)                     | 41 (22.7%)                        | 0.694          |
| Aminoglycosides                                                     | 22 (15.3%)                     | 25 (13.8%)                        | 0.709          |
| <b>Drug Resistant Patterns</b>                                      |                                |                                   |                |
| MDR-TB                                                              | 85 (59.0%)                     | 117 (64.6%)                       | 0.569          |
| pre-XDR-TB                                                          | 48 (33.3%)                     | 51 (28.2%)                        |                |
| XDR-TB                                                              | 11 (7.6%)                      | 13 (7.2%)                         |                |
| <b>Most frequently used anti-TB drugs in the Background Regimen</b> |                                |                                   |                |
| Fluoroquinolones                                                    |                                |                                   |                |
| Levofloxacin                                                        | 87 (60.4%)                     | 155 (85.6%)                       |                |
| Moxifloxacin                                                        | 57 (39.6%)                     | 26 (14.4%)                        |                |
| Aminoglycosides                                                     |                                |                                   |                |
| Capreomycin                                                         | 43 (29.9%)                     | 13 (7.2%)                         |                |
| Kanamycin                                                           | 23 (16.0%)                     | 125 (69.1%)                       |                |
| Amikacin                                                            | 76 (52.8%)                     | 43 (23.8%)                        |                |
| Pyrazinamide                                                        | 140 (97.2%)                    | 162 (89.5%)                       |                |
| Prothionamide                                                       | 136 (94.4%)                    | 180 (99.4%)                       |                |
| Para-aminosalicylic acid                                            | 8 (5.6%)                       | 152 (83.5%)                       |                |

Data are presented as n(%), unless otherwise stated.

Abbreviations: SD, standard deviation; IQR, interquartile range; DM, diabetes mellitus; TB, tuberculosis; MDR, multidrug resistant; pre-XDR, pre-extensive drug resistant; XDR, extensive drug resistant

**Table 2 Comparison of treatment outcomes of multidrug-resistant/extensively drug resistant tuberculosis cases treated with or without cycloserine.**

|                                | <b>Cycloserine<br/>(N=144)</b> | <b>No Cycloserine<br/>(N=181)</b> | <b><i>P</i> value</b> |
|--------------------------------|--------------------------------|-----------------------------------|-----------------------|
| <b>Treatment Success</b>       | <b>100 (69.4%)</b>             | <b>108 (59.7%)</b>                | <b>0.089</b>          |
| Cure                           | 94 (65.3%)                     | 106 (58.6%)                       |                       |
| Treatment Completion           | 6 (4.1%)                       | 2 (1.1%)                          |                       |
| <b>Treatment Failure</b>       | <b>37 (25.7%)</b>              | <b>60 (33.2%)</b>                 |                       |
| Fail to conversion at 6 months | 13 (9.0%)                      | 26 (14.4%)                        |                       |
| Reversion                      | 8 (5.6%)                       | 9 (5.0%)                          |                       |
| Adverse drug reactions         | 16 (11.1%)                     | 25 (13.8%)                        |                       |
| <b>Death</b>                   | 0 (0.0%)                       | 1 (0.5%)                          |                       |
| <b>Default</b>                 | 7 (4.9%)                       | 12 (6.6%)                         |                       |



**Table 3 Cox regression analysis of potential independent variables associated with unfavorable treatment outcome in multidrug resistant tuberculosis cases**

| Variables                                      | Univariate Cox Regression |         | Multivariate Cox Regression |         |
|------------------------------------------------|---------------------------|---------|-----------------------------|---------|
|                                                | Crude HR (95%CI)          | P value | Adjusted HR (95%CI)         | P value |
| Age ≥ 60 years                                 | 2.23 (1.32–3.66)          | 0.003   | 2.61 (1.46–4.65)            | 0.001   |
| Cough                                          | 3.11 (1.45–6.68)          | 0.004   | 2.34 (1.07–5.11)            | 0.033   |
| Fever                                          | 1.83 (1.17–2.87)          | 0.008   | 1.57 (0.95–2.61)            | 0.079   |
| Bilateral involvement                          | 1.92 (1.18–3.10)          | 0.008   | 1.45 (0.88–2.38)            | 0.141   |
| Previous fluoroquinolones treatment*           | 1.80 (1.20–2.70)          | 0.004   | 1.71 (1.08–2.83)            | 0.024   |
| Previous aminoglycosides treatment*            | 1.71 (1.10–2.69)          | 0.019   | 1.01 (0.58–1.76)            | 0.969   |
| Resistance to fluoroquinolones                 | 2.55 (1.57–4.14)          | <0.001  | 1.92 (1.16–3.16)            | 0.011   |
| Resistance to aminoglycosides                  | 2.61 (1.37–4.99)          | 0.004   | 1.35 (0.68–2.70)            | 0.391   |
| Cycloserine treatment <sup>†</sup>             | 0.66 (0.45–0.96)          | 0.030   | 0.53 (0.35–0.81)            | 0.003   |
| Pyrazinamide treatment <sup>†</sup>            | 0.38 (0.22–0.66)          | 0.001   | 0.70 (0.20–2.41)            | 0.570   |
| Clarithromycin treatment <sup>†</sup>          | 2.32 (1.44–3.72)          | <0.001  | 1.97 (0.91–4.25)            | 0.085   |
| High-dose isoniazid treatment <sup>†</sup>     | 2.23 (1.20–4.15)          | 0.012   | 0.58 (0.15–2.25)            | 0.430   |
| Amoxicillin–clavulanate treatment <sup>†</sup> | 4.11 (1.30–12.99)         | 0.016   | 5.07 (1.42–18.17)           | 0.013   |

Abbreviations: HR, Hazard Ratio; CI, confidence interval

\* Treated with fluoroquinolones or aminoglycosides more than 30 days before.

<sup>†</sup> Treated with cycloserine, pyrazinamide, clarithromycin, high-dose isoniazid or amoxicillin-clavulanate as the baseline regimen.

**Table 4 Side effects associated with cycloserine or requiring to withdraw cycloserine.**

| <b>Patient ID</b> | <b>Age (years)</b> | <b>Daily CS doses*</b> | <b>Interval time† (days)</b> | <b>Side effects</b>   | <b>Relationship to CS</b> | <b>Doses Adjustment or Stoppage</b> |
|-------------------|--------------------|------------------------|------------------------------|-----------------------|---------------------------|-------------------------------------|
| <b>P9</b>         | 48                 | 500mg                  | 119                          | abdominal distension  | Unlikely related          | De-escalation to 250mg              |
| <b>P80</b>        | 52                 | 750mg                  | 115                          | headache              | Probably related          | temporarily stopped (2 days)        |
| <b>P89</b>        | 51                 | 500mg                  | 132                          | depression            | Probably related          | permanently stopped                 |
| <b>P90</b>        | 39                 | 750mg                  | 10                           | seizures              | Possibly related          | permanently stopped                 |
| <b>P96</b>        | 28                 | 750mg                  | 164                          | headache              | Probably related          | permanently stopped                 |
| <b>P106</b>       | 56                 | 500mg                  | 127                          | seizures              | Possibly related          | permanently stopped                 |
| <b>P109</b>       | 57                 | 500mg                  | 16                           | headache              | Probably related          | No adjustment                       |
|                   |                    |                        | 16                           | peripheral neuropathy | Possibly related          | No adjustment                       |
| <b>P110</b>       | 61                 | 500mg                  | 80                           | tremor                | Possibly related          | permanently stopped                 |
| <b>P112</b>       | 63                 | 500mg                  | 41                           | rash                  | Possibly related          | No adjustment                       |
| <b>P115</b>       | 45                 | 750mg                  | 331                          | headache              | Possibly related          | De-escalation to 500mg              |
| <b>P117</b>       | 49                 | 500mg                  | 50                           | headache              | Probably related          | permanently stopped                 |
| <b>P119</b>       | 45                 | 750mg                  | 28                           | anxiety               | Possible related          | temporarily stopped (1 month)       |
| <b>P123</b>       | 38                 | 750mg                  | 58                           | headache              | Probably related          | No adjustment                       |
| <b>P124</b>       | 35                 | 750mg                  | 154                          | headache              | Probably related          | De-escalation to 500mg              |
| <b>P127</b>       | 37                 | 750mg                  | 71                           | headache              | Probably related          | No adjustment                       |
| <b>P143</b>       | 39                 | 750mg                  | 21                           | anxiety               | Probably related          | permanently stopped                 |

\*Daily CS doses refer to the doses in the background regimen.

†Interval time from start of therapy to appearance of side effects (days).

Abbreviation: CS, cycloserine; mg, milligram.

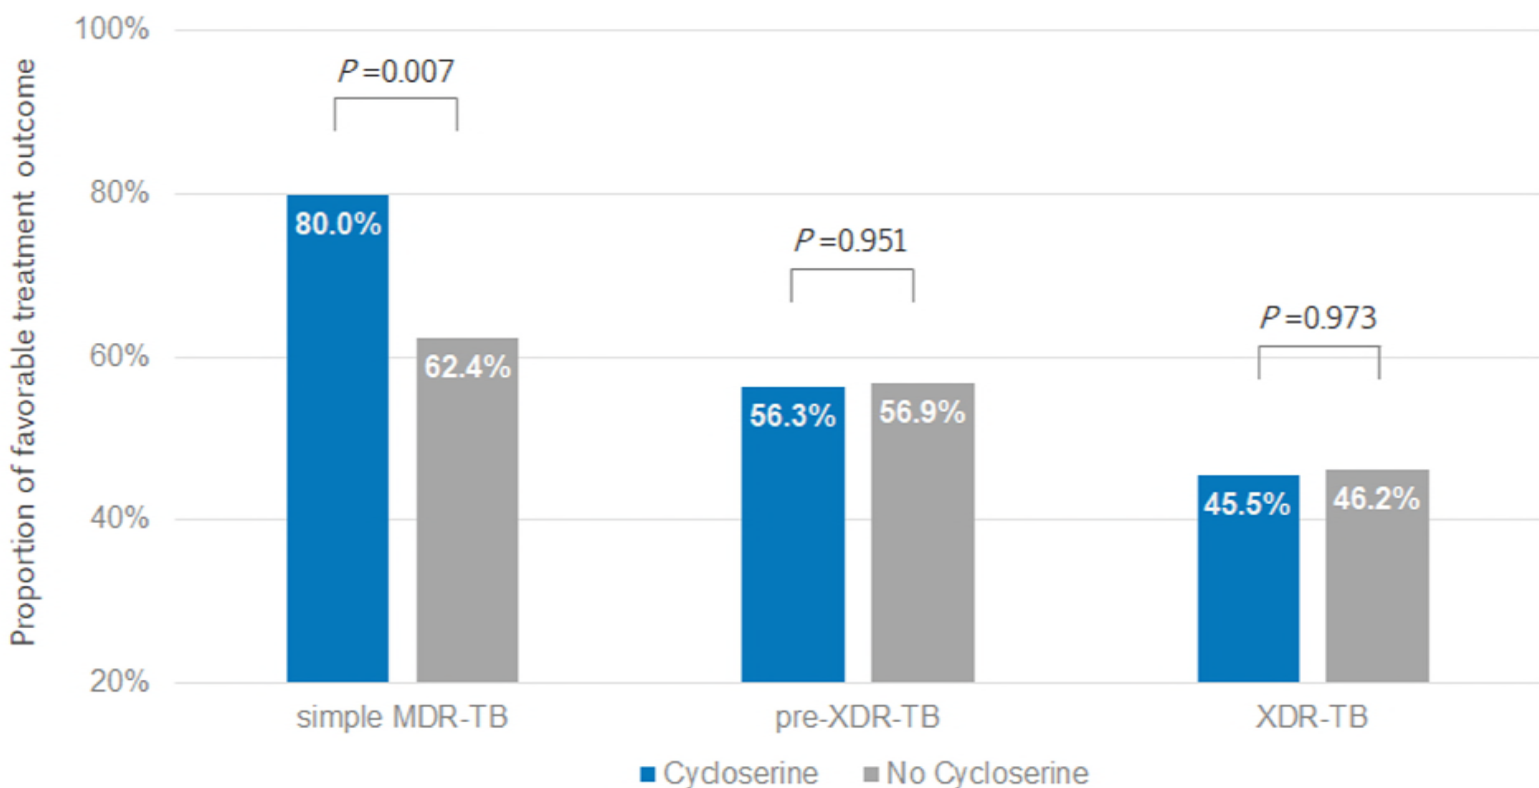

Figure 1 Proportions of favorable treatment outcome, according to the resistance pattern among patients treated with and without cycloserine.

Abbreviation: MDR-TB, multidrug resistant tuberculosis; XDR-TB, extensively drug-resistant tuberculosis.

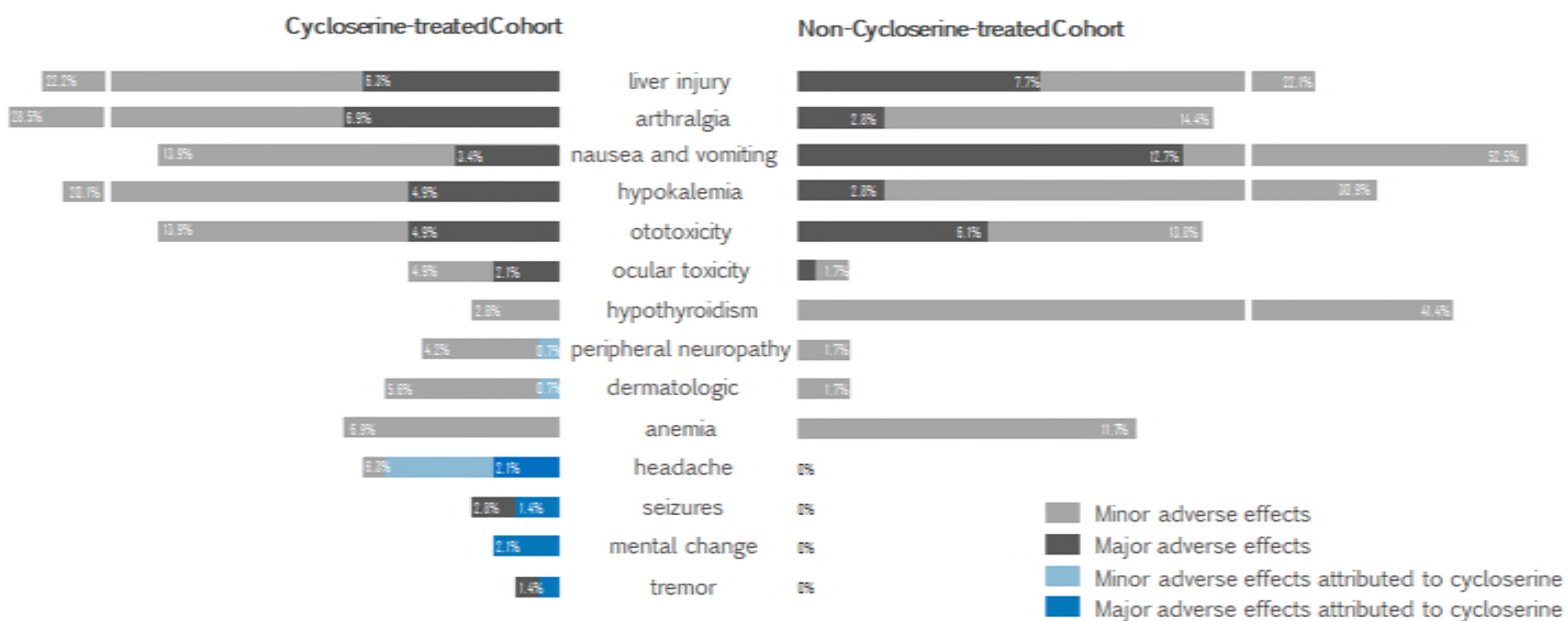

Figure 2 Adverse drug reactions in patients with and without cycloserine treated for multidrug-resistant tuberculosis in China. Adverse drug reactions which were associated with cycloserine are marked in sky blue (Minor adverse effects) or navy blue (Major adverse effects).
